# Supplementary material for: Lactate Dehydrogenase Inhibitors Suppress Borrelia burgdorferi Growth In Vitro
Source: MDPI journal article supplement (doi:10.3390/pathogens12070962), 2023-07-22

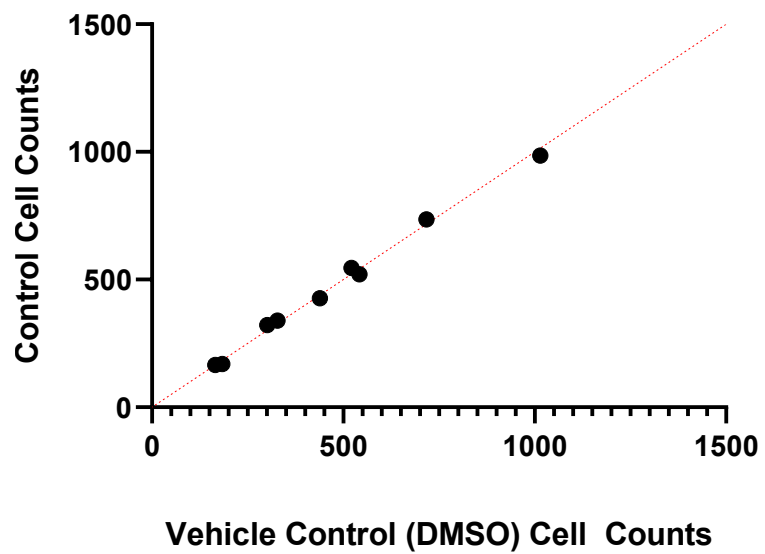

## Comparison of AT-101 and Gossypol impacts on *Borrelia*

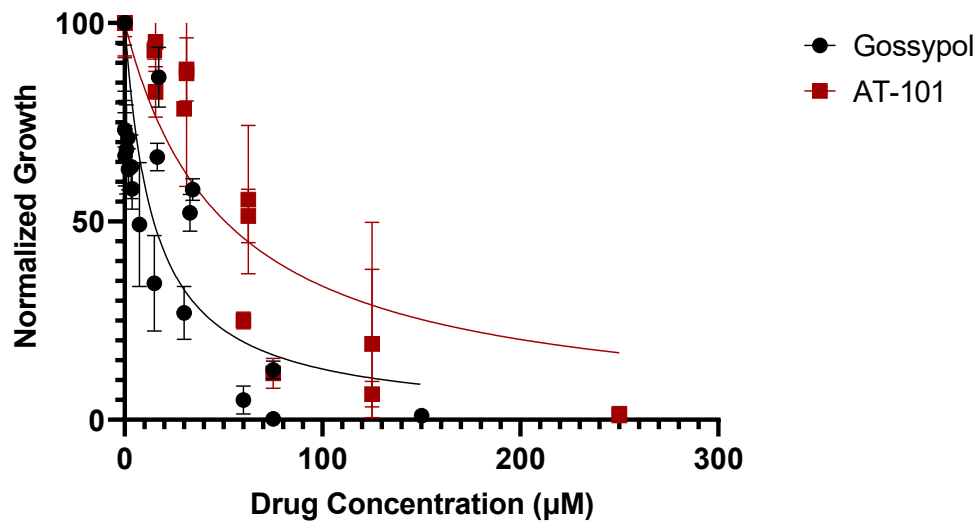

|           |   |                                                                |
|-----------|---|----------------------------------------------------------------|
| BbLDH     | 1 | ML-----KSNKVVLIGAGGVGSSSFAYALTIDNSLVHELVIIDVNENKAKGEVMDLNHGQ   |
| HsLDHA    | 1 | MAQLIYNEPQNKITVVGVGAVGMACAISILM-KDLADELALVDVIEDKLGEMMDLQHGS    |
| consensus | 1 | * ..... ** . . * * . ** * . . . * ** . . ** * * * * . * * . ** |

|           |    |                                                              |
|-----------|----|--------------------------------------------------------------|
| BbLDH     | 55 | MFLKKNINVLFGTYKDCANADIVVITAGLNQKPGETRLDLVDKNSKIFKDIITNVVSSGF |
| HsLDHA    | 60 | LFLRTPKIVSGKDYNVNTANSKLVITAGARQQEGESRLNLVQRNVNIFKFIIPNVVKYSP |
| consensus | 61 | . ** . * * * * . * . * * * * * * * . * * * * * * * * *       |

|           |     |                                                              |
|-----------|-----|--------------------------------------------------------------|
| BbLDH     | 115 | DGIFVVASNPVDIMTYVTMKYSKFPIHKVIGTGTILDTSLRLRYFLSDHFNVTQNIHSYI |
| HsLDHA    | 120 | NCKLLIVSNPVDILTIVAWKISGFPKNRVIGSGCNLDSARFRYLMGERLGVHPLSCHGWV |
| consensus | 121 | . . * * * * * . * * * * * * * * . * * * * * . . . * * . .    |

|           |     |                                                               |
|-----------|-----|---------------------------------------------------------------|
| BbLDH     | 175 | MGEHGDSSFATWDETKI---AMKPLSEYLAEGKITELELDEIHKKVVNAAAYEVIKLGAT  |
| HsLDHA    | 180 | LGEHGDSSVPVWSGMNVAGVSLKTLHPDLGTDKDKE-QWKEVHKQVVESAYEVIKLGYT   |
| consensus | 181 | . * * * * * * * * * . . . . . * * * * . * * * * * * * * * * * |

|           |     |                                                               |
|-----------|-----|---------------------------------------------------------------|
| BbLDH     | 232 | YYAIGLGIKNIVNAIIGDQNVILPISSYINGQYGGLIKDIYIGAPAIIVCKEGVKEVINFK |
| HsLDHA    | 239 | SWAIGLSVADLAESIMKNLRRVHPVSTMIKGLYG- IKDDVFLSVPCILGQNGISDLVKVT |
| consensus | 241 | . * * * * . . * . . * * . * * * * . * * * * * * * . * . . .   |

|           |     |                           |
|-----------|-----|---------------------------|
| BbLDH     | 292 | ISPKELDKFNSSANQLKSYIDKMEF |
| HsLDHA    | 298 | LTSEEEARLKKSADTLWGIQKELQF |
| consensus | 301 | . . * . * * * . * *       |

## A. Morphologies of Open vs. Closed form LDH

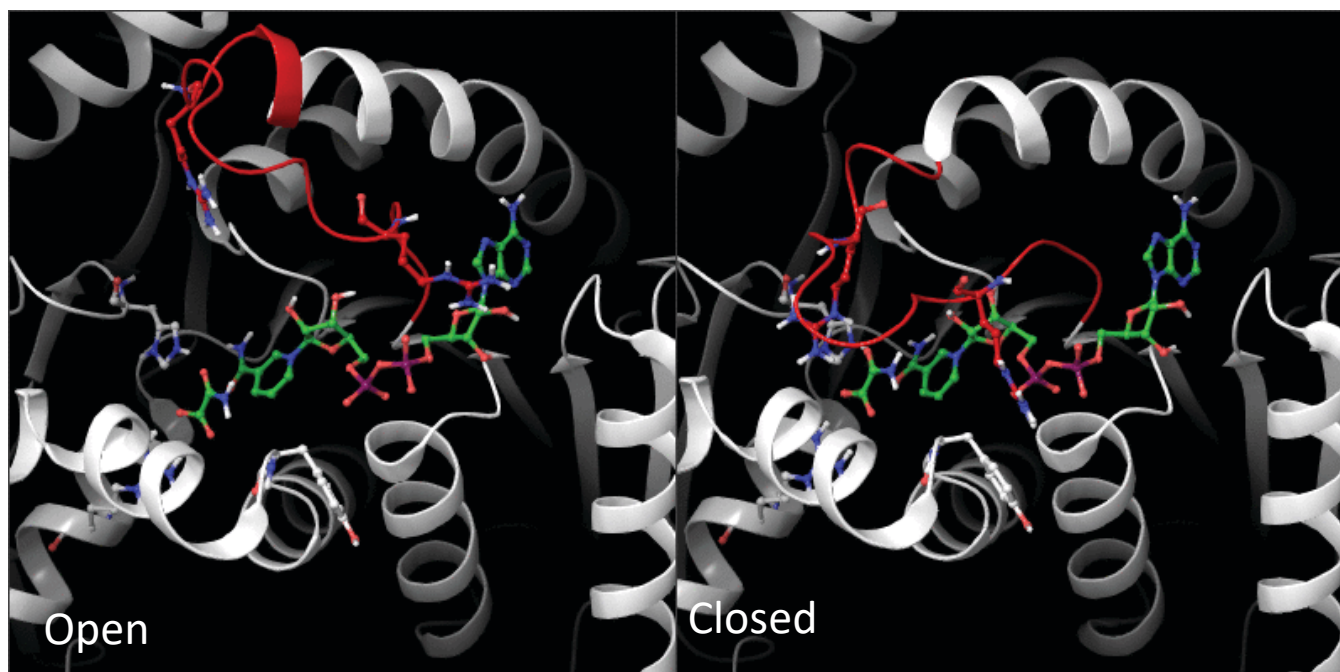

## B. Gossypol targets the Open form of LDH

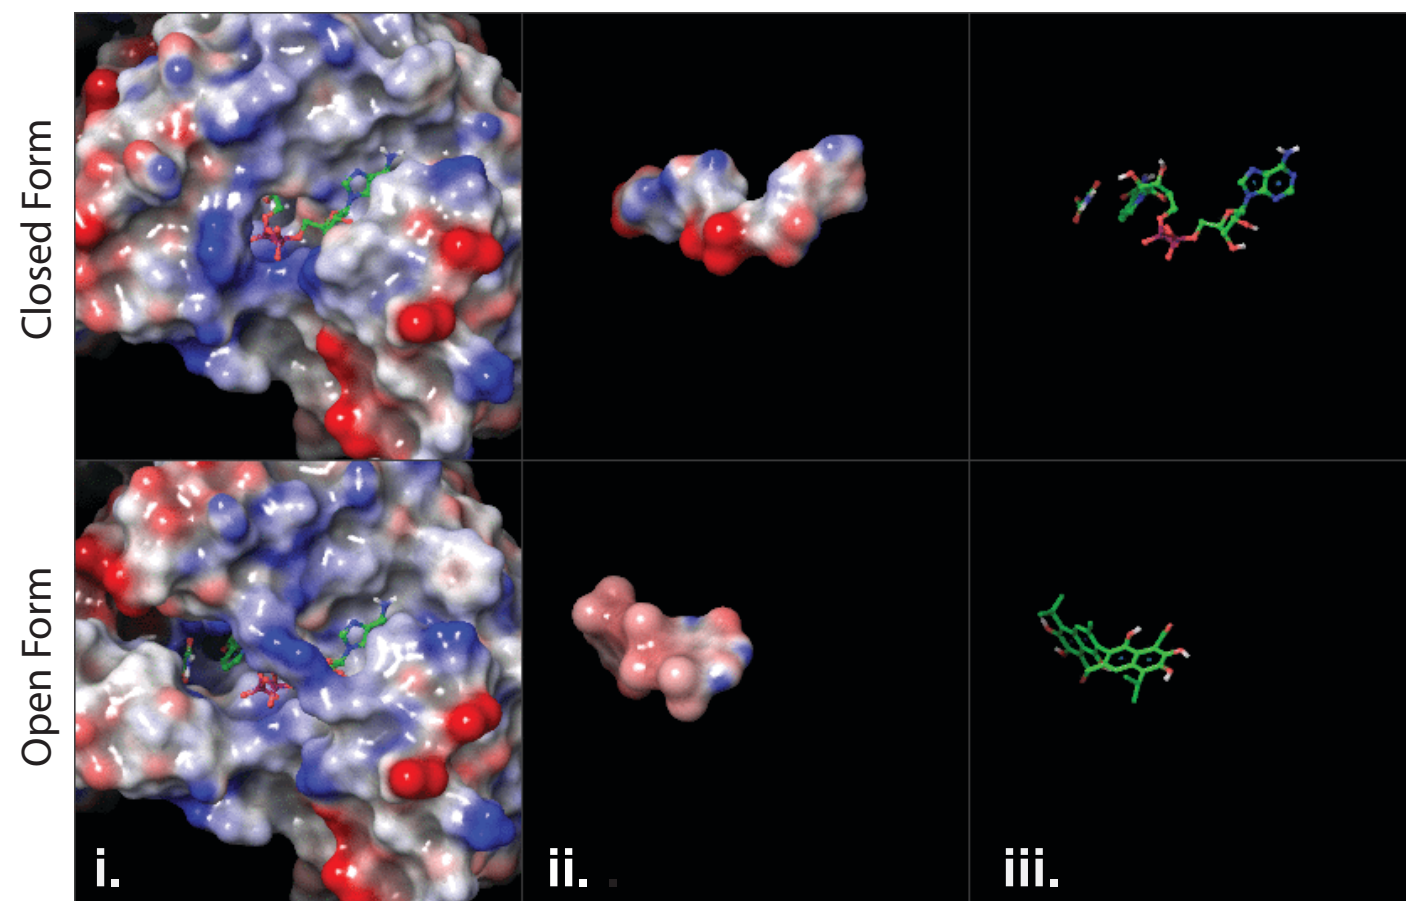

Supplement: s1 [file s1]
